# Supplementary material for: K3Ti2Cl9−xBrx: structurally stable lead-free perovskites as permissive absorbers for solar cell and visible-light photocatalysis
Source: Royal Society of Chemistry journal article supplement (doi:10.1039/d6ra01597b), 2026-06-03
Supplement: d6ra01597b1.pdf [file d6ra01597b1.pdf]

## **$K_3Ti_2Cl_{9-x}Br_x$ : Structurally stable lead-free Perovskites as permissive absorbers for Solar Cell and Visible-Light Photocatalysis**

Shahid Mehmood\*<sup>1</sup>, Shah Rukh Khan<sup>1</sup>, Shaimaa A.M. Abdelmohsen<sup>2</sup>, Meznah M. Alanazi\*\*<sup>2</sup>, Hanan Al Ghamdi<sup>2</sup>, Mohamed Mousa\*\*\*<sup>3</sup>

*1 Department of Physics, University of Malakand, Chakdara, 18800, Pakistan*

*2 Department of Physics, College of Science, Princess Nourah bint Abdulrahman University P.O. Box 84428, Riyadh, 11671, )*

*3 Electrical Engineering Department, Future University in Egypt, Cairo, 11835, Egypt*

*\*Corresponding author: Dr. Shahid Mehmood [shahiduom07@gmail.com](mailto:shahiduom07@gmail.com)*

*\*\*Corresponding author: Dr. Meznah M. Alanazi [malenazy@pnu.edu.sa](mailto:malenazy@pnu.edu.sa)*

*\*\*\*Corresponding author: Dr. Mohamed Mousa [mousam8919@gmail.com](mailto:mousam8919@gmail.com)*

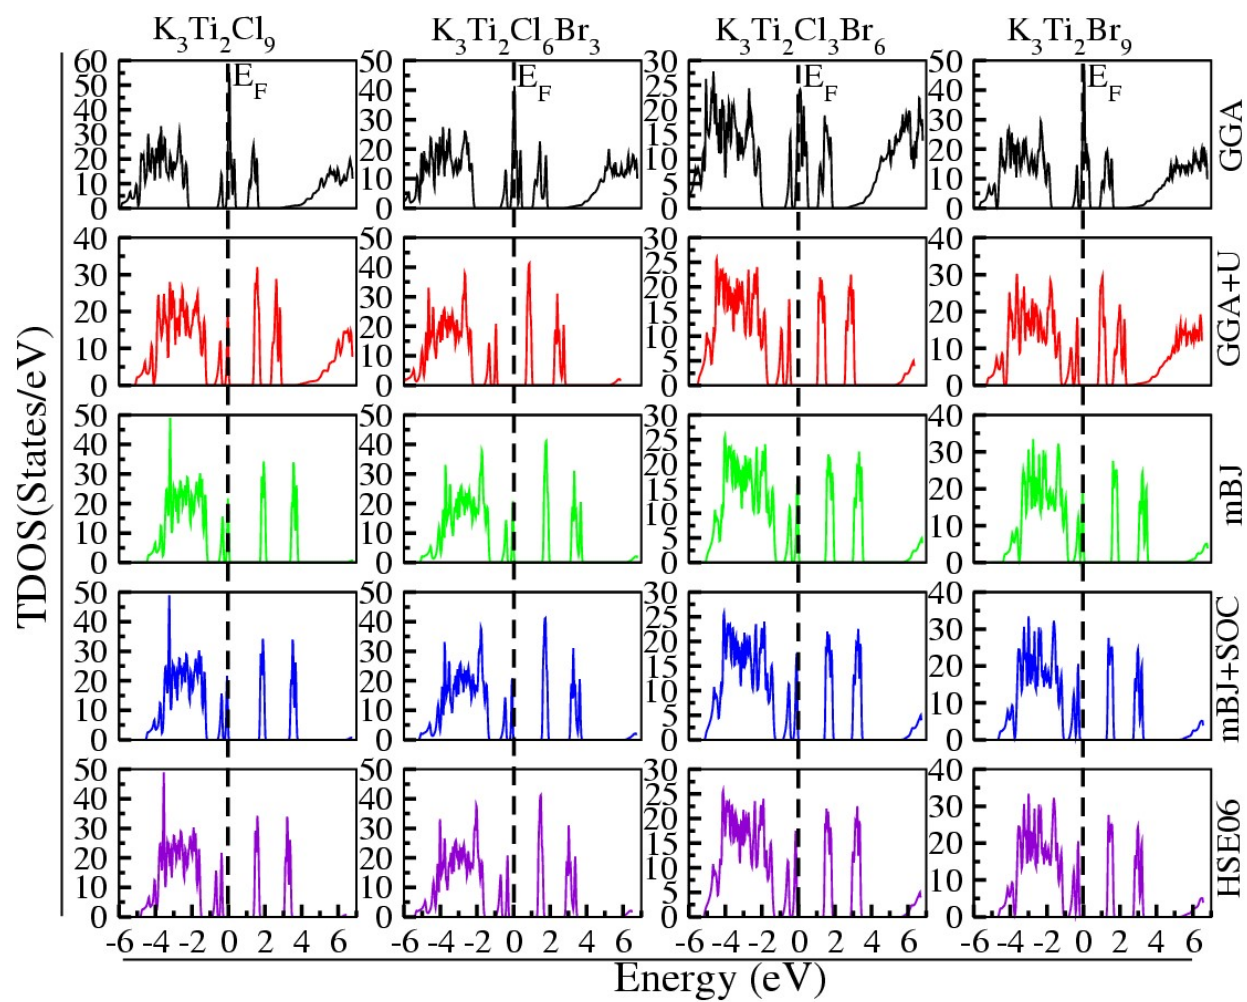

Fig. S1 TDOS of the  $K_3Ti_2Cl_{9-x}Br_x$  ( $X = 0, 3, 6$  and  $9$ ) compound.





**Table S3:** Input parameters for different Hybrid ETLs taken in this study.

| Parameters                                         | PCBM-PCPB <sup>6</sup> | PCBM-SnS <sub>2</sub> <sup>7</sup> | TiO <sub>2</sub> -SnO <sub>2</sub> <sup>8</sup> |
|----------------------------------------------------|------------------------|------------------------------------|-------------------------------------------------|
| Thickness (nm)                                     | 50                     | 45                                 | 50                                              |
| E <sub>g</sub> (eV)                                | 2                      | 1.57                               | 3.3                                             |
| χ <sub>e</sub> (eV)                                | 3.9                    | 4                                  | 4                                               |
| ε <sub>1</sub> (eV)                                | 3.9                    | 4.2                                | 9                                               |
| N <sub>c</sub> (cm <sup>-3</sup> )                 | 2.5×10 <sup>21</sup>   | 2.5×10 <sup>19</sup>               | 2×10 <sup>18</sup>                              |
| N <sub>v</sub> (cm <sup>-3</sup> )                 | 2.5×10 <sup>21</sup>   | 2.5×10 <sup>19</sup>               | 1.8×10 <sup>19</sup>                            |
| V <sub>Th,e</sub> (cm s <sup>-1</sup> )            | 10 <sup>7</sup>        | 10 <sup>7</sup>                    | 10 <sup>7</sup>                                 |
| V <sub>Th,h</sub> (cm s <sup>-1</sup> )            | 10 <sup>7</sup>        | 10 <sup>7</sup>                    | 10 <sup>7</sup>                                 |
| μ <sub>e</sub> (cm <sup>2</sup> Vs <sup>-1</sup> ) | 5.5×10 <sup>-4</sup>   | 2.89×10 <sup>-4</sup>              | 30                                              |
| μ <sub>h</sub> (cm <sup>2</sup> Vs <sup>-1</sup> ) | 5.5×10 <sup>-4</sup>   | 2.89×10 <sup>-4</sup>              | 15                                              |
| N <sub>D</sub> (cm <sup>-3</sup> )                 | 3×10 <sup>17</sup>     | 2.4×10 <sup>17</sup>               | 2×10 <sup>20</sup>                              |
| N <sub>A</sub> (cm <sup>-3</sup> )                 | 0                      | 0                                  | 0                                               |
| N <sub>T</sub> (cm <sup>-3</sup> )                 | 10 <sup>15</sup>       | 10 <sup>15</sup>                   | 10 <sup>15</sup>                                |

**Table S4:** PCE verses different thickness of  $K_3Ti_2Cl_9$  as absorber.

| Thickness (nm) | $V_{oc}$ | $J_{sc}$ | FF    | PCE   |
|----------------|----------|----------|-------|-------|
| 200            | 1.20     | 17.08    | 81.96 | 16.92 |
| 300            | 1.20     | 17.31    | 81.93 | 17.14 |
| 400            | 1.20     | 17.47    | 81.82 | 17.29 |
| 500            | 1.22     | 17.59    | 81.13 | 17.43 |
| 600            | 1.24     | 17.68    | 80.37 | 17.73 |
| 700            | 1.26     | 17.75    | 80.66 | 18.10 |
| 800            | 1.27     | 17.80    | 80.93 | 18.34 |
| 900            | 1.28     | 17.77    | 81.36 | 18.52 |
| 1000           | 1.28     | 17.76    | 81.68 | 18.67 |
| 1100           | 1.29     | 17.78    | 81.85 | 18.79 |
| 1200           | 1.29     | 17.80    | 81.96 | 18.89 |
| 1300           | 1.29     | 17.82    | 82.03 | 18.97 |
| 1400           | 1.30     | 17.83    | 82.08 | 19.05 |
| 1500           | 1.30     | 17.84    | 82.16 | 19.12 |
| 1600           | 1.30     | 17.86    | 82.22 | 19.18 |
| 1700           | 1.30     | 17.87    | 82.27 | 19.23 |
| 1800           | 1.31     | 17.88    | 82.31 | 19.28 |
| 1900           | 1.31     | 17.89    | 82.35 | 19.33 |
| 2000           | 1.31     | 17.89    | 82.38 | 19.37 |

**Table S5:** PCE verses different thickness of  $\text{K}_3\text{Ti}_2\text{Cl}_6\text{Br}_3$  as absorber.

| Thickness (nm) | $V_{oc}$ | $J_{sc}$ | FF    | PCE   |
|----------------|----------|----------|-------|-------|
| 200            | 1.29     | 18.27    | 82.78 | 19.55 |
| 300            | 1.29     | 19.59    | 82.49 | 20.91 |
| 400            | 1.29     | 20.53    | 81.99 | 21.79 |
| 500            | 1.29     | 21.22    | 81.73 | 22.45 |
| 600            | 1.29     | 21.74    | 81.80 | 23.02 |
| 700            | 1.29     | 22.44    | 81.72 | 23.74 |
| 800            | 1.29     | 22.68    | 81.67 | 23.98 |
| 900            | 1.29     | 22.87    | 81.63 | 24.16 |
| 1000           | 1.29     | 23.02    | 81.60 | 24.31 |
| 1100           | 1.29     | 23.13    | 81.58 | 24.42 |
| 1200           | 1.29     | 23.23    | 81.56 | 24.51 |
| 1300           | 1.29     | 23.30    | 81.55 | 24.59 |
| 1400           | 1.29     | 23.37    | 81.54 | 24.65 |
| 1500           | 1.29     | 23.42    | 81.53 | 24.70 |
| 1600           | 1.29     | 23.47    | 81.52 | 24.74 |
| 1700           | 1.29     | 23.50    | 81.51 | 24.77 |
| 1800           | 1.29     | 23.53    | 81.51 | 24.80 |
| 1900           | 1.29     | 23.56    | 81.50 | 24.83 |
| 2000           | 1.29     | 23.59    | 81.50 | 24.85 |

**Table S6:** PCE verses different thickness of  $K_3Ti_2Cl_3Br_6$  as absorber.

| Thickness (nm) | $V_{oc}$ | $J_{sc}$ | FF    | PCE   |
|----------------|----------|----------|-------|-------|
| 200            | 1.27     | 21.01    | 80.82 | 21.67 |
| 300            | 1.27     | 22.32    | 80.09 | 22.75 |
| 400            | 1.26     | 23.25    | 79.82 | 23.55 |
| 500            | 1.26     | 23.93    | 79.73 | 24.15 |
| 600            | 1.26     | 24.42    | 79.69 | 24.57 |
| 700            | 1.25     | 24.79    | 79.69 | 24.88 |
| 800            | 1.25     | 25.07    | 79.73 | 25.09 |
| 900            | 1.25     | 25.29    | 79.76 | 25.25 |
| 1000           | 1.24     | 25.45    | 79.78 | 25.36 |
| 1100           | 1.24     | 25.58    | 79.80 | 25.44 |
| 1200           | 1.24     | 25.68    | 79.82 | 25.50 |
| 1300           | 1.24     | 25.76    | 79.84 | 25.54 |
| 1400           | 1.23     | 25.83    | 79.87 | 25.56 |
| 1500           | 1.23     | 25.88    | 79.92 | 25.58 |
| 1600           | 1.23     | 25.92    | 79.95 | 25.58 |
| 1700           | 1.23     | 25.96    | 79.97 | 25.58 |
| 1800           | 1.23     | 25.98    | 79.99 | 25.58 |
| 1900           | 1.22     | 26.01    | 80.00 | 25.57 |
| 2000           | 1.22     | 26.03    | 80.01 | 25.56 |

**Table S7:** PCE verses different thickness of  $K_3Ti_2Br_9$  as absorber.

| Thickness (nm) | $V_{oc}$ | $J_{sc}$ | FF    | PCE   |
|----------------|----------|----------|-------|-------|
| 200            | 1.36     | 22.04    | 82.24 | 24.78 |
| 300            | 1.36     | 23.59    | 81.54 | 26.30 |
| 400            | 1.36     | 24.68    | 80.99 | 27.31 |
| 500            | 1.36     | 25.46    | 80.57 | 27.99 |
| 600            | 1.36     | 26.03    | 80.25 | 28.47 |
| 700            | 1.36     | 26.44    | 80.00 | 28.81 |
| 800            | 1.35     | 26.76    | 79.80 | 29.04 |
| 900            | 1.35     | 27.00    | 79.66 | 29.20 |
| 1000           | 1.35     | 27.18    | 79.55 | 29.32 |
| 1100           | 1.35     | 27.33    | 79.48 | 29.41 |
| 1200           | 1.35     | 27.44    | 79.40 | 29.46 |
| 1300           | 1.35     | 27.54    | 79.34 | 29.50 |
| 1400           | 1.34     | 27.61    | 79.28 | 29.52 |
| 1500           | 1.34     | 27.67    | 79.24 | 29.54 |
| 1600           | 1.34     | 27.73    | 79.20 | 29.54 |
| 1700           | 1.34     | 27.77    | 79.18 | 29.54 |
| 1800           | 1.34     | 27.81    | 79.15 | 29.53 |
| 1900           | 1.34     | 27.84    | 79.15 | 29.53 |
| 2000           | 1.33     | 27.86    | 79.17 | 29.52 |

**Table S8:** PCE verses different thickness of  $K_3Ti_2Cl_9$  as absorber.

| $N_A$              | $V_{oc}$ | $J_{sc}$ | FF    | PCE   |
|--------------------|----------|----------|-------|-------|
| $1 \times 10^{10}$ | 1.20     | 17.84    | 81.73 | 17.64 |
| $1 \times 10^{11}$ | 1.20     | 17.84    | 81.73 | 17.64 |
| $1 \times 10^{12}$ | 1.20     | 17.84    | 81.73 | 17.64 |
| $1 \times 10^{13}$ | 1.20     | 17.84    | 81.73 | 17.64 |
| $1 \times 10^{14}$ | 1.21     | 17.84    | 81.63 | 17.63 |
| $1 \times 10^{15}$ | 1.28     | 17.77    | 81.36 | 18.52 |
| $1 \times 10^{16}$ | 1.37     | 17.56    | 83.26 | 20.08 |
| $1 \times 10^{17}$ | 1.44     | 17.46    | 84.26 | 21.30 |
| $1 \times 10^{18}$ | 1.56     | 17.42    | 85.02 | 22.32 |
| $1 \times 10^{19}$ | 1.61     | 17.52    | 84.33 | 23.28 |
| $1 \times 10^{20}$ | 1.67     | 17.52    | 83.83 | 24.65 |
| $N_t$              |          |          |       |       |
| $1 \times 10^{10}$ | 1.28     | 17.77    | 81.42 | 18.54 |
| $1 \times 10^{11}$ | 1.28     | 17.77    | 81.42 | 18.54 |
| $1 \times 10^{12}$ | 1.28     | 17.77    | 81.42 | 18.54 |
| $1 \times 10^{13}$ | 1.28     | 17.77    | 81.42 | 18.54 |
| $1 \times 10^{14}$ | 1.28     | 17.77    | 82.36 | 18.52 |
| $1 \times 10^{15}$ | 1.28     | 17.76    | 80.83 | 18.39 |
| $1 \times 10^{16}$ | 1.27     | 17.72    | 77.61 | 17.58 |
| $1 \times 10^{17}$ | 1.23     | 17.60    | 72.25 | 15.71 |

**Table S9:** PCE verses different thickness of  $K_3Ti_2Cl_6Br_3$  as absorber.

| $N_A$              | $V_{oc}$ | $J_{sc}$ | FF    | PCE   |
|--------------------|----------|----------|-------|-------|
| $1 \times 10^{10}$ | 1.28     | 23.64    | 78.88 | 23.99 |
| $1 \times 10^{11}$ | 1.28     | 23.64    | 78.88 | 23.99 |
| $1 \times 10^{12}$ | 1.28     | 23.64    | 78.86 | 23.98 |
| $1 \times 10^{13}$ | 1.28     | 23.64    | 78.64 | 23.91 |
| $1 \times 10^{14}$ | 1.28     | 23.64    | 79.39 | 24.11 |
| $1 \times 10^{15}$ | 1.29     | 23.59    | 81.50 | 24.85 |
| $1 \times 10^{16}$ | 1.32     | 23.08    | 81.94 | 24.99 |
| $1 \times 10^{17}$ | 1.36     | 22.52    | 82.86 | 25.56 |
| $1 \times 10^{18}$ | 1.41     | 22.34    | 83.44 | 26.39 |
| $1 \times 10^{19}$ | 1.38     | 22.29    | 79.24 | 24.43 |
| $1 \times 10^{20}$ | 1.51     | 22.28    | 86.49 | 29.29 |
| $N_t$              |          |          |       |       |
| $1 \times 10^{10}$ | 1.30     | 23.61    | 82.18 | 25.28 |
| $1 \times 10^{11}$ | 1.30     | 23.61    | 82.18 | 25.28 |
| $1 \times 10^{12}$ | 1.30     | 23.61    | 82.18 | 25.28 |
| $1 \times 10^{13}$ | 1.30     | 23.60    | 82.08 | 25.23 |
| $1 \times 10^{14}$ | 1.29     | 23.59    | 81.50 | 24.85 |
| $1 \times 10^{15}$ | 1.25     | 23.45    | 79.52 | 23.40 |
| $1 \times 10^{16}$ | 1.20     | 23.06    | 75.71 | 20.98 |
| $1 \times 10^{17}$ | 1.11     | 22.42    | 71.47 | 17.92 |

**Table S10:** PCE verses different thickness of  $K_3Ti_2Cl_3Br_6$  as absorber.

| $N_A$              | $V_{oc}$ | $J_{sc}$ | FF    | PCE   |
|--------------------|----------|----------|-------|-------|
| $1 \times 10^{10}$ | 1.25     | 25.29    | 77.75 | 24.69 |
| $1 \times 10^{11}$ | 1.25     | 25.29    | 77.75 | 24.69 |
| $1 \times 10^{12}$ | 1.25     | 25.29    | 77.75 | 24.69 |
| $1 \times 10^{13}$ | 1.25     | 25.29    | 77.61 | 24.68 |
| $1 \times 10^{14}$ | 1.25     | 25.29    | 79.47 | 24.61 |
| $1 \times 10^{15}$ | 1.25     | 25.29    | 79.76 | 25.25 |
| $1 \times 10^{16}$ | 1.27     | 25.68    | 81.41 | 26.18 |
| $1 \times 10^{17}$ | 1.28     | 24.96    | 81.83 | 26.31 |
| $1 \times 10^{18}$ | 1.30     | 23.75    | 82.18 | 25.53 |
| $1 \times 10^{19}$ | 1.29     | 22.96    | 77.72 | 23.06 |
| $1 \times 10^{20}$ | 1.42     | 22.81    | 83.70 | 27.14 |
| $N_t$              |          |          |       |       |
| $1 \times 10^{10}$ | 1.28     | 25.29    | 82.08 | 26.70 |
| $1 \times 10^{11}$ | 1.28     | 25.29    | 82.08 | 26.70 |
| $1 \times 10^{12}$ | 1.28     | 25.29    | 81.99 | 26.66 |
| $1 \times 10^{13}$ | 1.28     | 25.29    | 81.33 | 26.39 |
| $1 \times 10^{14}$ | 1.25     | 25.29    | 79.76 | 25.25 |
| $1 \times 10^{15}$ | 1.17     | 25.28    | 78.41 | 23.38 |
| $1 \times 10^{16}$ | 1.10     | 25.22    | 74.94 | 20.92 |
| $1 \times 10^{17}$ | 1.02     | 24.75    | 69.53 | 17.57 |

**Table S11:** PCE verses different thickness of  $K_3Ti_2Br_9$  as absorber.

| $N_A$              | $V_{oc}$ | $J_{sc}$ | FF    | PCE   |
|--------------------|----------|----------|-------|-------|
| $1 \times 10^{10}$ | 1.36     | 22.04    | 82.37 | 24.82 |
| $1 \times 10^{11}$ | 1.36     | 22.04    | 82.37 | 24.82 |
| $1 \times 10^{12}$ | 1.36     | 22.04    | 82.35 | 24.82 |
| $1 \times 10^{13}$ | 1.36     | 22.04    | 82.35 | 24.82 |
| $1 \times 10^{14}$ | 1.36     | 22.04    | 82.24 | 24.78 |
| $1 \times 10^{15}$ | 1.36     | 22.04    | 82.41 | 24.85 |
| $1 \times 10^{16}$ | 1.37     | 22.04    | 82.77 | 24.93 |
| $1 \times 10^{17}$ | 1.38     | 22.04    | 83.17 | 25.08 |
| $1 \times 10^{18}$ | 1.40     | 22.02    | 82.98 | 24.91 |
| $1 \times 10^{19}$ | 1.44     | 21.78    | 78.48 | 22.69 |
| $1 \times 10^{20}$ | 1.48     | 19.49    | 83.42 | 22.25 |
| $N_t$              |          |          |       |       |
| $1 \times 10^{10}$ | 1.37     | 22.04    | 83.33 | 25.17 |
| $1 \times 10^{11}$ | 1.37     | 22.04    | 83.33 | 25.17 |
| $1 \times 10^{12}$ | 1.37     | 22.04    | 83.33 | 25.17 |
| $1 \times 10^{13}$ | 1.36     | 22.04    | 82.23 | 24.78 |
| $1 \times 10^{14}$ | 1.34     | 22.04    | 79.15 | 23.53 |
| $1 \times 10^{15}$ | 1.33     | 22.04    | 79.17 | 23.37 |
| $1 \times 10^{16}$ | 1.24     | 22.04    | 77.75 | 21.37 |
| $1 \times 10^{17}$ | 1.15     | 22.04    | 75.73 | 19.23 |

**Table S12:** PCE verses different thickness of  $\text{K}_3\text{Ti}_2\text{Cl}_9$  as absorber.

| $R_s$    | $V_{oc}$ | $J_{sc}$ | FF    | PCE   |
|----------|----------|----------|-------|-------|
| 0        | 1.30     | 17.84    | 82.16 | 19.12 |
| 1        | 1.30     | 17.84    | 80.87 | 18.82 |
| 2        | 1.30     | 17.84    | 79.59 | 18.52 |
| 3        | 1.30     | 17.84    | 78.30 | 18.22 |
| 4        | 1.30     | 17.84    | 77.02 | 17.92 |
| 5        | 1.30     | 17.77    | 75.74 | 17.62 |
| 6        | 1.30     | 17.56    | 74.46 | 17.32 |
| 7        | 1.30     | 17.46    | 73.23 | 17.04 |
| 8        | 1.30     | 17.42    | 71.94 | 16.74 |
| 9        | 1.30     | 17.52    | 70.71 | 16.45 |
| 10       | 1.30     | 17.52    | 69.45 | 16.15 |
| $R_{sh}$ |          |          |       |       |
| $10^1$   | 0.17     | 16.99    | 25.00 | 0.76  |
| $10^2$   | 1.18     | 17.76    | 37.33 | 7.86  |
| $10^3$   | 1.26     | 17.84    | 78.56 | 17.77 |
| $10^4$   | 1.29     | 17.84    | 81.39 | 18.85 |
| $10^5$   | 1.30     | 17.84    | 81.50 | 18.96 |
| $10^6$   | 1.30     | 17.84    | 81.51 | 18.97 |
| $10^7$   | 1.30     | 17.84    | 81.51 | 18.97 |
| $10^8$   | 1.30     | 17.84    | 81.51 | 18.97 |

**Table S13:** PCE verses different thickness of  $\text{K}_3\text{Ti}_2\text{Cl}_6\text{Br}_3$  as absorber.

| $R_s$    | $V_{oc}$ | $J_{sc}$ | FF    | PCE   |
|----------|----------|----------|-------|-------|
| 0        | 1.29     | 23.42    | 81.53 | 24.70 |
| 1        | 1.29     | 23.42    | 79.82 | 24.18 |
| 2        | 1.29     | 23.42    | 78.11 | 23.67 |
| 3        | 1.29     | 23.42    | 76.41 | 23.15 |
| 4        | 1.29     | 23.42    | 74.74 | 22.64 |
| 5        | 1.29     | 23.42    | 73.06 | 22.13 |
| 6        | 1.29     | 23.42    | 69.71 | 21.12 |
| 7        | 1.29     | 23.42    | 68.04 | 20.61 |
| 8        | 1.29     | 23.42    | 66.37 | 20.11 |
| 9        | 1.29     | 23.42    | 64.72 | 19.61 |
| 10       | 1.29     | 23.42    | 63.06 | 19.11 |
| $R_{sh}$ |          |          |       |       |
| $10^1$   | 0.23     | 22.31    | 22.00 | 1.31  |
| $10^2$   | 1.20     | 23.36    | 47.96 | 13.27 |
| $10^3$   | 1.28     | 23.38    | 81.42 | 18.54 |
| $10^4$   | 1.28     | 23.40    | 81.42 | 18.54 |
| $10^5$   | 1.28     | 23.42    | 82.36 | 18.52 |
| $10^6$   | 1.28     | 23.42    | 82.83 | 18.39 |
| $10^7$   | 1.28     | 23.42    | 82.83 | 17.58 |
| $10^8$   | 1.28     | 23.42    | 82.83 | 15.71 |

**Table S14:** PCE verses different thickness of  $\text{K}_3\text{Ti}_2\text{Cl}_3\text{Br}_6$  as absorber.

| $R_s$    | $V_{oc}$ | $J_{sc}$ | FF    | PCE   |
|----------|----------|----------|-------|-------|
| 0        | 1.23     | 25.88    | 79.92 | 25.58 |
| 1        | 1.23     | 25.88    | 77.95 | 24.95 |
| 2        | 1.23     | 25.88    | 75.98 | 24.32 |
| 3        | 1.23     | 25.88    | 74.02 | 23.69 |
| 4        | 1.23     | 25.88    | 72.07 | 23.07 |
| 5        | 1.23     | 25.88    | 70.12 | 22.44 |
| 6        | 1.23     | 25.88    | 68.17 | 21.82 |
| 7        | 1.23     | 25.88    | 66.31 | 21.23 |
| 8        | 1.23     | 25.88    | 64.40 | 20.62 |
| 9        | 1.23     | 25.88    | 62.51 | 20.01 |
| 10       | 1.23     | 25.88    | 60.62 | 19.41 |
| $R_{sh}$ |          |          |       |       |
| $10^1$   | 0.25     | 24.65    | 28.00 | 1.60  |
| $10^2$   | 1.13     | 25.75    | 52.93 | 15.41 |
| $10^3$   | 1.20     | 25.87    | 77.96 | 24.25 |
| $10^4$   | 1.23     | 25.88    | 79.00 | 25.16 |
| $10^5$   | 1.23     | 25.88    | 78.94 | 25.25 |
| $10^6$   | 1.23     | 25.88    | 78.93 | 25.26 |
| $10^7$   | 1.23     | 25.88    | 78.93 | 25.26 |
| $10^8$   | 1.23     | 25.88    | 78.93 | 25.26 |

**Table S15:** PCE verses different thickness of  $K_3Ti_2Br_9$  as absorber.

| <b><math>R_s</math></b> | <b><math>V_{oc}</math></b> | <b><math>J_{sc}</math></b> | <b>FF</b> | <b>PCE</b> |
|-------------------------|----------------------------|----------------------------|-----------|------------|
| 0                       | 1.34                       | 27.67                      | 79.24     | 29.54      |
| 1                       | 1.34                       | 27.67                      | 77.30     | 28.81      |
| 2                       | 1.34                       | 27.67                      | 75.36     | 28.09      |
| 3                       | 1.34                       | 27.67                      | 73.43     | 27.37      |
| 4                       | 1.34                       | 27.67                      | 71.51     | 26.66      |
| 5                       | 1.34                       | 27.67                      | 69.58     | 25.94      |
| 6                       | 1.34                       | 27.67                      | 67.67     | 25.23      |
| 7                       | 1.34                       | 27.67                      | 65.81     | 24.53      |
| 8                       | 1.34                       | 27.67                      | 63.93     | 23.84      |
| 9                       | 1.34                       | 27.67                      | 62.07     | 23.14      |
| 10                      | 1.34                       | 27.67                      | 60.21     | 22.45      |
| $R_{sh}$                |                            |                            |           |            |
| $10^1$                  | 0.27                       | 27.37                      | 29        | 1.71       |
| $10^2$                  | 1.11                       | 27.48                      | 72.25     | 17.58      |
| $10^3$                  | 1.20                       | 27.59                      | 77.61     | 18.39      |
| $10^4$                  | 1.20                       | 27.67                      | 80.83     | 18.52      |
| $10^5$                  | 1.20                       | 27.67                      | 81.36     | 18.54      |
| $10^6$                  | 1.20                       | 27.67                      | 81.42     | 18.54      |
| $10^7$                  | 1.20                       | 27.67                      | 81.42     | 18.54      |
| $10^8$                  | 1.20                       | 27.67                      | 81.42     | 18.54      |

## References

- [1] M. K. Hossain, M. H. K. Rubel, G. F. I. Toki, I. Alam, M. F. Rahman, H. Bencherif, Effect of various electron and hole transport layers on the performance of CsPbI<sub>3</sub>-based perovskite solar cells: A numerical investigation in DFT, SCAPS-1D, and wxAMPS frameworks. *ACS Omega* 7, 43210–43230 (2022). <https://doi.org/10.1021/acsomega.2c05912>
- [2] S. Ahmed, F. Jannat, M. A. K. Khan, and M. A. Alim, Numerical development of eco-friendly Cs<sub>2</sub>TiBr<sub>6</sub> based perovskite solar cell with all-inorganic charge transport materials via SCAPS-1D. *Optik*, 165765 (2021). <https://doi.org/10.1016/j.ijleo.2020.165765>
- [3] L. R. Karna, R. Upadhyay and A. Ghosh, All-inorganic perovskite photovoltaics for power conversion efficiency of 31%, *Scientific Reports*, 13, 15212 (2023). <https://doi.org/10.1038/s41598-023-42447-w>
- [4] S. Srivastava, A. K. Singh, P. Kumar, B. Pradhan, Comparative performance analysis of lead-free perovskites solar cells by numerical simulation, *J. Appl. Phys.* 131, 175001 (2022) <https://doi.org/10.1063/5.0088099>
- [5] J. P. Leitão, N. M. Santos, P. A. Fernandes, P. M. P. Salomé, A. F. da Cunha, C. González, G. M. Ribeiro, and F. M. Martinaga . *Physical Review B*, 84(2), 024120 (2011). <https://doi.org/10.1103/PhysRevB.84.024120>
- [6] Shu-Hui Li, Zhou Xing, Bao-Shan Wu, Zuo-Chang Chen, Yang-Rong Yao, Han-Rui Tian, Meng-Fan Li, D. Q. Yun, L. L. Deng, S. Y. Xie, R. B. Huang, L. S. Zheng Hybrid Fullerene-Based Electron Transport Layers Improving the Thermal Stability of Perovskite Solar Cells, *ACS Appl. Mater. Interfaces.* 12, 18, 20733–20740 (2020), <https://doi.org/10.1021/acscami.0c02119>
- [7] Pramila Patil, Dilpreet Singh Mann, Umesh T. Nakate, Yoon-Bong Hahn, Sung-Nam Kwon, Seok-In Na, Hybrid interfacial ETL engineering using PCBM-SnS<sub>2</sub> for High-

Performance p-i-n structured planar perovskite solar cells, Chem. Eng. J. 397, 125504 (2020),  
<https://doi.org/10.1016/j.cej.2020.125504>

[8] Min Jae Paik, J. W. Yoo, H. Q. CELLS, J. Park, E. Noh, SnO<sub>2</sub> –TiO<sub>2</sub> Hybrid Electron Transport Layer for Efficient and Flexible Perovskite Solar Cells, ACS Energy Letters 7(5):1864-1870 (2022), [10.1021/acseenergylett.2c00637](https://doi.org/10.1021/acseenergylett.2c00637)
